# Supplementary material for: Identification of Stemness Characteristics Associated With the Immune Microenvironment and Prognosis in Gastric Cancer
Source: Front Oncol. 2021 Mar 3;11:626961. doi: 10.3389/fonc.2021.626961 (PMC7966731; doi:10.3389/fonc.2021.626961)
Supplement: Supplementary Table 1 — The TMB of each sample in the TCGA cohort. [file Table_1.xls]

id	TMB
TCGA-BR-8589-01A	30.37777778
TCGA-EQ-5647-01A	1.933333333
TCGA-VQ-A91E-01A	22.17777778
TCGA-D7-6518-01A	2.088888889
TCGA-D7-5577-01A	3.088888889
TCGA-FP-7916-01A	2.688888889
TCGA-RD-A7C1-01A	7.6
TCGA-CD-5801-01A	10.6
TCGA-BR-8592-01A	0.866666667
TCGA-BR-8367-01A	1.688888889
TCGA-VQ-A94T-01A	2.155555556
TCGA-CG-4438-01A	3.711111111
TCGA-VQ-A8DV-01A	1.822222222
TCGA-HJ-7597-01A	22.17777778
TCGA-BR-4370-01A	31.51111111
TCGA-BR-A4PD-01A	4.4
TCGA-BR-8291-01A	0.8
TCGA-VQ-AA6A-01A	2.644444444
TCGA-HU-8238-01A	4.822222222
TCGA-IN-8663-01A	4.577777778
TCGA-VQ-A8PQ-01A	0.355555556
TCGA-CG-5733-01A	32.75555556
TCGA-BR-8588-01A	3.422222222
TCGA-BR-7196-01A	1.711111111
TCGA-CG-4437-01A	15.24444444
TCGA-CG-4442-01A	41.75555556
TCGA-D7-A6EY-01A	40.42222222
TCGA-FP-7829-01A	6.8
TCGA-HU-A4H0-01A	4.822222222
TCGA-BR-8483-01A	3.666666667
TCGA-VQ-A8E7-01B	2.822222222
TCGA-BR-A4J7-01A	1.488888889
TCGA-RD-A8N1-01A	2.844444444
TCGA-BR-4279-01A	1.422222222
TCGA-F1-6875-01A	2.511111111
TCGA-VQ-AA6K-01A	2.044444444
TCGA-CD-8529-01A	12.15555556
TCGA-IN-7806-01A	2.044444444
TCGA-RD-A8N0-01A	0.088888889
TCGA-D7-6820-01A	2.488888889
TCGA-FP-A9TM-01A	4.288888889
TCGA-CG-5722-01A	2.422222222
TCGA-HU-8243-01A	3.711111111
TCGA-BR-8485-01A	9.933333333
TCGA-HU-A4GT-01A	44.13333333
TCGA-B7-A5TJ-01A	6.933333333
TCGA-HU-A4H6-01A	3.177777778
TCGA-IP-7968-01A	3.022222222
TCGA-CG-5720-01A	2.088888889
TCGA-BR-7723-01A	4.377777778
TCGA-D7-8574-01A	0.933333333
TCGA-BR-4184-01A	99.04444444
TCGA-HU-8244-01A	3.533333333
TCGA-VQ-A922-01A	4.355555556
TCGA-CD-A489-01A	2.133333333
TCGA-HU-A4G9-01A	23.53333333
TCGA-BR-6801-01A	1.266666667
TCGA-BR-7707-01A	37.86666667
TCGA-BR-A453-01A	1.422222222
TCGA-BR-8486-01A	7.711111111
TCGA-BR-7957-01A	1.222222222
TCGA-CD-8524-01A	4.177777778
TCGA-BR-8369-01A	5.288888889
TCGA-BR-6458-01A	8.488888889
TCGA-IN-8462-01A	3.422222222
TCGA-VQ-A91V-01A	6.6
TCGA-IN-A6RL-01A	13.6
TCGA-IN-A6RP-01A	4.644444444
TCGA-D7-A6F2-01A	1.888888889
TCGA-IN-A7NT-01A	3.088888889
TCGA-CG-5734-01A	2.377777778
TCGA-HU-A4GH-01A	20.17777778
TCGA-BR-4357-01A	6.511111111
TCGA-VQ-A8PM-01A	1.4
TCGA-BR-7704-01A	9.666666667
TCGA-VQ-AA6J-01A	3.6
TCGA-BR-A4QI-01A	3.577777778
TCGA-3M-AB46-01A	4.822222222
TCGA-CG-4306-01A	32.35555556
TCGA-KB-A93G-01A	2.555555556
TCGA-BR-8370-01A	3.155555556
TCGA-BR-A4IY-01A	4.066666667
TCGA-CD-5800-01A	4.577777778
TCGA-BR-8361-01A	47.26666667
TCGA-CG-4476-01A	3.133333333
TCGA-BR-A4J6-01A	1.022222222
TCGA-R5-A7ZI-01A	24.4
TCGA-BR-4256-01A	28.88888889
TCGA-BR-8297-01A	7.8
TCGA-D7-6522-01A	1.088888889
TCGA-CD-5799-01A	1.111111111
TCGA-BR-8296-01A	2.044444444
TCGA-BR-8384-01A	1.155555556
TCGA-D7-8579-01A	3.155555556
TCGA-HU-A4GC-01A	4.088888889
TCGA-HU-A4GN-01A	33.6
TCGA-VQ-AA69-01A	1.844444444
TCGA-HU-A4H3-01A	27.11111111
TCGA-BR-8289-01A	5.755555556
TCGA-ZQ-A9CR-01A	2.911111111
TCGA-VQ-A8DT-01A	4.777777778
TCGA-BR-6707-01A	1.844444444
TCGA-CG-5717-01A	2.666666667
TCGA-BR-4255-01A	1.577777778
TCGA-VQ-A923-01A	2.866666667
TCGA-BR-4191-01A	6.088888889
TCGA-IN-A6RI-01A	2.733333333
TCGA-CG-5719-01A	1.733333333
TCGA-CG-4460-01A	53.86666667
TCGA-HU-A4HD-01A	5.444444444
TCGA-D7-6524-01A	2.822222222
TCGA-RD-A7BS-01A	1.644444444
TCGA-VQ-A91D-01A	68.86666667
TCGA-VQ-A8PJ-01A	4.111111111
TCGA-BR-6803-01A	0.355555556
TCGA-F1-A448-01A	17.13333333
TCGA-RD-A8NB-01A	18.37777778
TCGA-BR-A452-01A	3.133333333
TCGA-BR-7851-01A	40.13333333
TCGA-BR-8679-01A	4.133333333
TCGA-SW-A7EB-01A	3.844444444
TCGA-D7-A4Z0-01A	7.933333333
TCGA-HU-A4GY-01A	1.711111111
TCGA-BR-8285-01A	2.644444444
TCGA-BR-8373-01A	2.6
TCGA-CD-8527-01A	7.355555556
TCGA-BR-8081-01A	26.91111111
TCGA-CG-5727-01A	4.333333333
TCGA-VQ-AA6G-01A	3.622222222
TCGA-BR-4368-01A	37.44444444
TCGA-R5-A7ZR-01A	1.955555556
TCGA-VQ-AA6B-01A	2.222222222
TCGA-VQ-A8PS-01A	1.333333333
TCGA-BR-4371-01A	4.088888889
TCGA-VQ-A91U-01A	4.2
TCGA-BR-4201-01A	41.04444444
TCGA-D7-6527-01A	5.533333333
TCGA-HU-8249-01A	4.111111111
TCGA-HU-A4G3-01A	3
TCGA-HF-7136-01A	2.422222222
TCGA-R5-A804-01A	2.044444444
TCGA-CG-5726-01A	40.24444444
TCGA-D7-A6EX-01A	3.244444444
TCGA-VQ-A8PD-01A	2.022222222
TCGA-BR-6852-01A	29.88888889
TCGA-VQ-A8P3-01A	7.888888889
TCGA-CG-4441-01A	3.088888889
TCGA-FP-8099-01A	4.066666667
TCGA-IN-7808-01A	2.8
TCGA-BR-6453-01A	4.822222222
TCGA-BR-8590-01A	3.266666667
TCGA-BR-7197-01A	4.866666667
TCGA-BR-8078-01A	47.48888889
TCGA-D7-A747-01A	2.511111111
TCGA-BR-6455-01A	2.533333333
TCGA-VQ-A8DL-01A	4.577777778
TCGA-BR-A4CS-01A	4.4
TCGA-VQ-A8PY-01A	2.333333333
TCGA-BR-7716-01A	4.222222222
TCGA-VQ-A928-01A	1.911111111
TCGA-BR-6565-01A	3.777777778
TCGA-CD-A4MI-01A	29.82222222
TCGA-VQ-A924-01A	38.55555556
TCGA-D7-A4YT-01A	8.488888889
TCGA-CG-5732-01A	1.511111111
TCGA-BR-A4J1-01A	1.866666667
TCGA-CD-8528-01A	2.911111111
TCGA-VQ-AA6F-01A	1.288888889
TCGA-BR-4280-01A	21.62222222
TCGA-BR-8591-01A	44.88888889
TCGA-BR-6563-01A	1.688888889
TCGA-BR-4362-01A	44.53333333
TCGA-BR-8678-01A	3.088888889
TCGA-CG-4466-01A	5.355555556
TCGA-HF-7132-01A	34.73333333
TCGA-BR-7958-01A	4.866666667
TCGA-HU-A4H5-01A	7.644444444
TCGA-CD-8533-01A	3.266666667
TCGA-FP-7735-01A	1.333333333
TCGA-CD-5813-01A	4.933333333
TCGA-BR-8058-01A	1.155555556
TCGA-CG-5728-01A	40.84444444
TCGA-CD-8525-01A	2.066666667
TCGA-FP-A8CX-01A	2.533333333
TCGA-VQ-AA68-01A	4.666666667
TCGA-BR-8295-01A	1.422222222
TCGA-HU-A4H8-01A	34.91111111
TCGA-BR-A4IV-01A	0.622222222
TCGA-MX-A5UJ-01A	41.28888889
TCGA-CD-8535-01A	7.422222222
TCGA-CD-A48A-01A	6.577777778
TCGA-B7-5816-01A	36.75555556
TCGA-CG-4465-01A	18.55555556
TCGA-BR-8690-01A	4.222222222
TCGA-CD-A4MH-01A	2.333333333
TCGA-BR-A4J5-01A	2.311111111
TCGA-B7-A5TN-01A	2.377777778
TCGA-VQ-A8PC-01A	3.4
TCGA-BR-7959-01A	2.555555556
TCGA-BR-4366-01A	3.622222222
TCGA-BR-4188-01A	2.111111111
TCGA-CD-8532-01A	1.2
TCGA-3M-AB47-01A	3.222222222
TCGA-BR-7722-01A	1.088888889
TCGA-BR-7703-01A	19.28888889
TCGA-BR-8363-01A	35.68888889
TCGA-SW-A7EA-01A	18.53333333
TCGA-FP-8211-01A	2.977777778
TCGA-BR-4363-01A	17.6
TCGA-HU-A4H2-01A	5.133333333
TCGA-RD-A7BW-01A	1.977777778
TCGA-BR-8059-01A	20.8
TCGA-CG-4462-01A	1.844444444
TCGA-D7-6815-01A	4.088888889
TCGA-VQ-A91Y-01A	1.266666667
TCGA-CD-A4MJ-01A	19.88888889
TCGA-BR-8484-01A	2.422222222
TCGA-BR-8368-01A	30.35555556
TCGA-VQ-A8PT-01A	40.6
TCGA-VQ-A8DZ-01A	2.266666667
TCGA-ZA-A8F6-01A	1.355555556
TCGA-BR-8366-01A	4.888888889
TCGA-CG-4475-01A	1.422222222
TCGA-EQ-8122-01A	4.866666667
TCGA-BR-4183-01A	1.444444444
TCGA-VQ-A8PB-01A	23.66666667
TCGA-MX-A666-01A	3.044444444
TCGA-R5-A7ZF-01A	1.644444444
TCGA-BR-4294-01A	0.844444444
TCGA-BR-A4PF-01A	2.888888889
TCGA-D7-5579-01A	3.955555556
TCGA-HU-A4GU-01A	43.26666667
TCGA-F1-6874-01A	27.02222222
TCGA-D7-6525-01A	4.444444444
TCGA-D7-A4YU-01A	5.6
TCGA-BR-7901-01A	4.288888889
TCGA-HU-A4G8-01A	44.06666667
TCGA-BR-A4QL-01A	53.11111111
TCGA-D7-8575-01A	1.422222222
TCGA-D7-8578-01A	1.533333333
TCGA-CG-4477-01A	4.222222222
TCGA-BR-A4IU-01A	0.555555556
TCGA-HU-A4G2-01A	1.222222222
TCGA-VQ-A92D-01A	3.733333333
TCGA-BR-6706-01A	5.066666667
TCGA-CD-A48C-01A	6.022222222
TCGA-HU-A4GX-01A	36.11111111
TCGA-VQ-A94O-01A	1.6
TCGA-BR-4361-01A	73.6
TCGA-RD-A8N5-01A	0.933333333
TCGA-RD-A8MW-01A	2.2
TCGA-IN-A6RR-01A	4.4
TCGA-HU-8604-01A	5.755555556
TCGA-VQ-A91A-01A	3.511111111
TCGA-RD-A8MV-01A	1.933333333
TCGA-BR-8677-01A	5.111111111
TCGA-RD-A7BT-01A	6.133333333
TCGA-D7-6520-01A	1.688888889
TCGA-CG-5716-01A	0.422222222
TCGA-BR-8687-01A	5.066666667
TCGA-VQ-A8E3-01A	21.2
TCGA-F1-6177-01A	39.86666667
TCGA-D7-6519-01A	1.511111111
TCGA-MX-A5UG-01A	1.044444444
TCGA-D7-6528-01A	9.177777778
TCGA-VQ-A8DU-01A	3.844444444
TCGA-BR-A44T-01A	0.622222222
TCGA-VQ-A91K-01A	39.8
TCGA-VQ-A94U-01A	4.422222222
TCGA-HF-A5NB-01A	42.26666667
TCGA-BR-8683-01A	4.288888889
TCGA-HU-A4GF-01A	3.933333333
TCGA-RD-A8N9-01A	3.444444444
TCGA-VQ-A91N-01A	3.266666667
TCGA-R5-A805-01A	3.4
TCGA-D7-A6F0-01A	3.555555556
TCGA-BR-A4J8-01A	2.6
TCGA-HU-A4GJ-01A	0.088888889
TCGA-VQ-A8E2-01A	3.066666667
TCGA-VQ-A8PZ-01A	2.222222222
TCGA-CD-5802-01A	1.577777778
TCGA-HU-A4GQ-01A	53.2
TCGA-VQ-A94R-01A	8.466666667
TCGA-CG-5718-01A	2.311111111
TCGA-BR-6802-01A	13.26666667
TCGA-BR-4257-01A	31.75555556
TCGA-CG-5723-01A	50.88888889
TCGA-HU-A4HB-01A	0.311111111
TCGA-D7-6822-01A	6.711111111
TCGA-D7-A748-01A	1.133333333
TCGA-BR-8286-01A	4.088888889
TCGA-BR-6454-01A	4.022222222
TCGA-HU-A4GD-01A	2.377777778
TCGA-BR-4267-01A	2.533333333
TCGA-VQ-A8P2-01A	200.5777778
TCGA-BR-7715-01A	3.488888889
TCGA-IN-AB1V-01A	1.555555556
TCGA-CD-A486-01A	2.733333333
TCGA-VQ-A94P-01A	1.733333333
TCGA-BR-6457-01A	2.822222222
TCGA-VQ-A8PU-01A	3.666666667
TCGA-BR-6705-01A	2.533333333
TCGA-CG-5725-01A	3.111111111
TCGA-FP-A4BF-01A	2.711111111
TCGA-D7-A4YX-01A	2.266666667
TCGA-BR-A4J4-01A	2.022222222
TCGA-CG-4436-01A	4.444444444
TCGA-D7-6526-01A	5.666666667
TCGA-HU-A4H4-01A	18.37777778
TCGA-VQ-AA6I-01A	2.711111111
TCGA-CG-4301-01A	1.377777778
TCGA-BR-A4PE-01A	5.822222222
TCGA-VQ-A91S-01A	7
TCGA-R5-A7O7-01A	3.288888889
TCGA-HU-8610-01A	1.533333333
TCGA-CG-5730-01A	4.377777778
TCGA-VQ-A927-01A	1.377777778
TCGA-CG-5721-01A	115.8888889
TCGA-BR-8487-01A	87.48888889
TCGA-BR-8682-01A	2.066666667
TCGA-IN-A7NU-01A	2.555555556
TCGA-VQ-A91X-01A	5.888888889
TCGA-FP-A4BE-01A	44.13333333
TCGA-BR-6566-01A	26.31111111
TCGA-BR-8077-01A	3.088888889
TCGA-VQ-A8P5-01A	5.266666667
TCGA-BR-A44U-01A	2.622222222
TCGA-BR-A4J9-01A	1.244444444
TCGA-BR-6709-01A	1.066666667
TCGA-BR-A4IZ-01A	0.355555556
TCGA-D7-A4YY-01A	14.88888889
TCGA-BR-8380-01A	1.866666667
TCGA-CG-5724-01A	3.111111111
TCGA-CD-5804-01A	2.088888889
TCGA-HU-8245-01A	1.8
TCGA-BR-4253-01A	2.266666667
TCGA-D7-8573-01A	2.333333333
TCGA-BR-6564-01A	0.866666667
TCGA-CG-4443-01A	2.666666667
TCGA-B7-5818-01A	10.57777778
TCGA-CD-5798-01A	2.466666667
TCGA-VQ-A8PO-01A	25.73333333
TCGA-D7-6817-01A	2.133333333
TCGA-BR-8676-01A	2.444444444
TCGA-D7-A6ET-01A	0.844444444
TCGA-CD-A4MG-01A	74.06666667
TCGA-IN-A6RJ-01A	3.422222222
TCGA-FP-7998-01A	1.666666667
TCGA-KB-A93J-01A	4.177777778
TCGA-BR-8365-01A	0.777777778
TCGA-IN-A6RO-01A	8
TCGA-VQ-A8PX-01A	17.95555556
TCGA-CD-8534-01A	1.533333333
TCGA-HF-7133-01A	2.555555556
TCGA-D7-5578-01A	6.111111111
TCGA-BR-4292-01A	41.35555556
TCGA-VQ-A91Q-01A	2.977777778
TCGA-VQ-A91Z-01A	3.844444444
TCGA-VQ-A8E0-01A	2.844444444
TCGA-HF-7134-01A	7.577777778
TCGA-CG-4469-01A	8.355555556
TCGA-R5-A7ZE-01B	4.155555556
TCGA-BR-6456-01A	1.111111111
TCGA-CD-8530-01A	2.377777778
TCGA-D7-8572-01A	5.177777778
TCGA-BR-8360-01A	27.11111111
TCGA-IN-AB1X-01A	3.111111111
TCGA-CD-A487-01A	4.511111111
TCGA-CD-5803-01A	0.866666667
TCGA-CD-8536-01A	26.11111111
TCGA-IN-A6RS-01A	3.022222222
TCGA-VQ-A8P8-01A	2.777777778
TCGA-CG-4444-01A	4.577777778
TCGA-BR-8284-01A	9.177777778
TCGA-BR-8364-01A	0.422222222
TCGA-VQ-A925-01A	3.4
TCGA-IN-A7NR-01A	2.266666667
TCGA-IN-A6RN-01A	3.311111111
TCGA-HF-7131-01A	2.444444444
TCGA-CG-4300-01A	3.222222222
TCGA-CG-4305-01A	34.6
TCGA-VQ-AA6D-01A	21.73333333
TCGA-D7-A74B-01A	0.777777778
TCGA-D7-8570-01A	3.244444444
TCGA-BR-A4J2-01A	1.377777778
TCGA-D7-A6EZ-01A	7.911111111
TCGA-BR-8371-01A	0.488888889
TCGA-BR-6452-01A	164
TCGA-RD-A8N4-01A	0.088888889
TCGA-BR-8080-01A	4.822222222
TCGA-BR-6710-01A	0.022222222
TCGA-VQ-A8PH-01A	5.6
TCGA-HU-8608-01A	2.444444444
TCGA-BR-A4CQ-01A	5
TCGA-BR-7717-01A	3.733333333
TCGA-B7-A5TI-01A	17.71111111
TCGA-BR-A4QM-01A	2.955555556
TCGA-RD-A8N6-01A	4.577777778
TCGA-KB-A6F7-01A	3.066666667
TCGA-CG-4440-01A	3.488888889
TCGA-CD-8531-01A	6.377777778
TCGA-VQ-A8PE-01A	3.4
TCGA-BR-8382-01A	27.44444444
TCGA-FP-8210-01A	0.088888889
TCGA-F1-A72C-01A	1.444444444
TCGA-CD-8526-01A	1.4
TCGA-VQ-AA64-01A	7.333333333
TCGA-CG-4474-01A	2.377777778
TCGA-VQ-A8PF-01A	2.888888889
TCGA-B7-A5TK-01A	1.355555556
TCGA-VQ-A91W-01A	1.244444444
TCGA-MX-A663-01A	2.155555556
TCGA-BR-8372-01A	38.62222222
TCGA-VQ-A8PP-01A	42.02222222
TCGA-D7-A4YV-01A	26.22222222
TCGA-FP-8631-01A	2.733333333
TCGA-BR-8680-01A	168.2444444
TCGA-BR-8060-01A	6.133333333
TCGA-D7-6818-01A	4.422222222
TCGA-BR-8686-01A	3.044444444
TCGA-BR-A4CR-01A	1.844444444
TCGA-HU-A4GP-01A	5.622222222
TCGA-CG-4304-01A	2.022222222
TCGA-BR-4369-01A	4.644444444
TCGA-EQ-A4SO-01A	5.222222222
TCGA-D7-8576-01A	1.644444444
TCGA-D7-A74A-01A	4.244444444
TCGA-D7-6521-01A	1.866666667
TCGA-BR-8381-01A	3.466666667
TCGA-BR-4187-01A	0.733333333
TCGA-VQ-A8PK-01A	2.466666667
TCGA-CG-4449-01A	2.6
TCGA-HU-8602-01A	48.42222222
TCGA-D7-A6EV-01A	4.4
TCGA-HU-A4G6-01A	2.222222222
TCGA-KB-A93H-01A	6.088888889
TCGA-CG-4455-01A	1.288888889
